# Supplementary material
Source: Research Square preprint supplement (doi:10.21203/rs.3.rs-9163441/v1)
Supplement: Supplementary file 1 [file 2e4052b0650de4a66dc72ea1.docx]

**Excerpt from the Interview Guide for Healthcare Workers and Family Members (questions related to the paper's research objectives)[[1]](#footnote-1).**

**OPENING QUESTION**

Could you tell me about your experience as a (healthcare worker or family member) during the COVID-19 pandemic, and more specifically, the changes you observed during the COVID-19 pandemic?

**ORGANIZATIONAL AND CLINICAL CHANGES**

*(The following table serves as a guide for the interview)*

|  | **QUESTIONS FOR HEALTHCARE WORKERS** | **QUESTIONS FOR FAMILY MEMBERS** | |
| --- | --- | --- | --- |
| Communication | - Could you describe the changes you observed regarding communication with residents’ loved ones during the COVID-19 pandemic? - How did you experience these changes in communication? - In end-of-life situations, how did communication with loved ones take place? - How would you describe the quality of communication with family members during the COVID-19 pandemic? | - Could you describe the changes you observed regarding communication during the COVID-19 pandemic?   - How did you experience these changes in communication?   - During your loved one’s end-of-life care, how did communication take place?   - How were you able to say goodbye to your loved one? - How would you describe the quality of communication during the COVID-19 pandemic? | |
| Grief Support/Follow-Up | - Could you describe the changes you observed regarding grief support/follow-up provided to the loved ones of residents who have died at the CHSLD during the COVID-19 pandemic? - What bereavement support activities or collective rituals were organized by the CHSLD to support the loved ones of a person who died during the COVID-19 pandemic?   - What should have been organized by the long-term care facility? | - What grief support activities or collective rituals were organized by the CHSLD to support the loved ones of a person who died during the COVID-19 pandemic?   - What grief support activities or collective rituals should the CHSLD have organized? | |
| Environment | - How would you describe the changes observed in the CHSLD environment due to the pandemic?   - Physical environment & atmosphere   - Activities carried out   - Social interactions between care staff and residents, presence of family members or volunteers - What effects might these changes have had on residents, family members and healthcare staff? | | - How would you describe the changes you observed in the long-term care facility’s environment due to the pandemic?   - Physical environment & atmosphere   - Activities carried out   - Social interactions between care staff and residents, presence of family members or volunteers - What effects might these changes have had on you or your loved one? |
| Health Measures | - In your opinion, what were the effects of the health measures implemented during the COVID-19 pandemic on end-of-life care?   - How did personal protective equipment and physical distancing influence end-of-life care?   - How did restrictions on the presence of loved ones at the resident’s bedside influence end-of-life care?   - How might the organization of the living environment have influenced end-of-life care?   - How might the shortage of healthcare staff have influenced end-of-life care? | | - In your opinion, what were the effects of the health measures implemented during the COVID-19 pandemic on end-of-life care?   - How might personal protective equipment and physical distancing have influenced end-of-life care?   - How might restrictions on family members’ presence at the resident’s bedside have influenced end-of-life care?   - How did the organization of the living environment influence end-of-life care?   - How might the shortage of nursing staff have influenced end-of-life care? |
| Effects | - Tell me about your perception of the quality of care you were able to provide to end-of-life residents during the COVID-19 pandemic? - During the COVID-19 pandemic, what organizational support was provided to caregivers to assist them in end-of-life situations?   - At the same time, what kind of support would caregivers have liked to receive to help them in their role with end-of-life residents? | |  |

**PDI (HEALTHCARE WORKERS ONLY)**

Finally, we would like to explore the pandemic’s impact on your mental health. To do this, we are using a validated tool for post-traumatic stress consisting of 12 statements that you will need to answer on a scale of 0 to 4: 0 being “not at all,” 1 “a little,” 2 “somewhat true,” 3 “very true,” and 4 “extremely true .

We ask that you think back to the most critical moment you experienced in the course of your duties since the start of the COVID-19 pandemic. Which wave did this critical moment occur during? (1st wave, 2nd wave, 3rd wave…)

Thinking back on that critical moment, would you say that:

**Peritraumatic Distress Inventory (PDI)[[2]](#footnote-2)**

| **Statements** | **Not at all** | **Somewhat** | **Somewhat true** | **Very true** | **Extremely true** |
| --- | --- | --- | --- | --- | --- |
| I felt helpless | 0 | 1 | 2 | 3 | 4 |
| I felt sadness and grief | 0 | 1 | 2 | 3 | 4 |
| I felt frustrated and angry | 0 | 1 | 2 | 3 | 4 |
| I was afraid for my own safety | 0 | 1 | 2 | 3 | 4 |
| I felt guilty | 0 | 1 | 2 | 3 | 4 |
| I was ashamed of my emotional reactions | 0 | 1 | 2 | 3 | 4 |
| I was worried about the safety of others | 0 | 1 | 2 | 3 | 4 |
| I felt like I was going to lose control of my emotions | 0 | 1 | 2 | 3 | 4 |
| I was horrified | 0 | 1 | 2 | 3 | 4 |
| I had physical reactions such as sweating, trembling, and palpitations | 0 | 1 | 2 | 3 | 4 |
| I felt like I was going to faint | 0 | 1 | 2 | 3 | 4 |
| I thought I might die | 0 | 1 | 2 | 3 | 4 |

1. Translation from French into English using DeepL pro [↑](#footnote-ref-1)
2. Jehel, L., Brunet, A., Paterniti, S., & Guelfi, J. D. (2005). Validation of the French version of the Peritraumatic Distress Inventory. *The Canadian Journal of Psychiatry*, *50*(1), 67–71.
   Brunet, A., Weiss, D. S., Metzler, T. J., Best, S. R., Neylan, T. C., Rogers, C., Fagan, J., Marmar, C. R. (2001). The Peritraumatic Distress Inventory: A proposed measure of PTSD criterion A2. *The American Journal of Psychiatry*, *158*(9), 1480-1485. [↑](#footnote-ref-2)
